# Supplementary material
Source: PubMed Central journal article supplement (PMC3838868)
Supplement: NIHMS525757-supplement-Supp_Figs__S1-S5_and_legend_for_video_file.pdf [file NIHMS525757-supplement-Supp_Figs__S1-S5_and_legend_for_video_file.pdf]

**Fig. S1.** Time course of plasma leucine isotopic enrichment

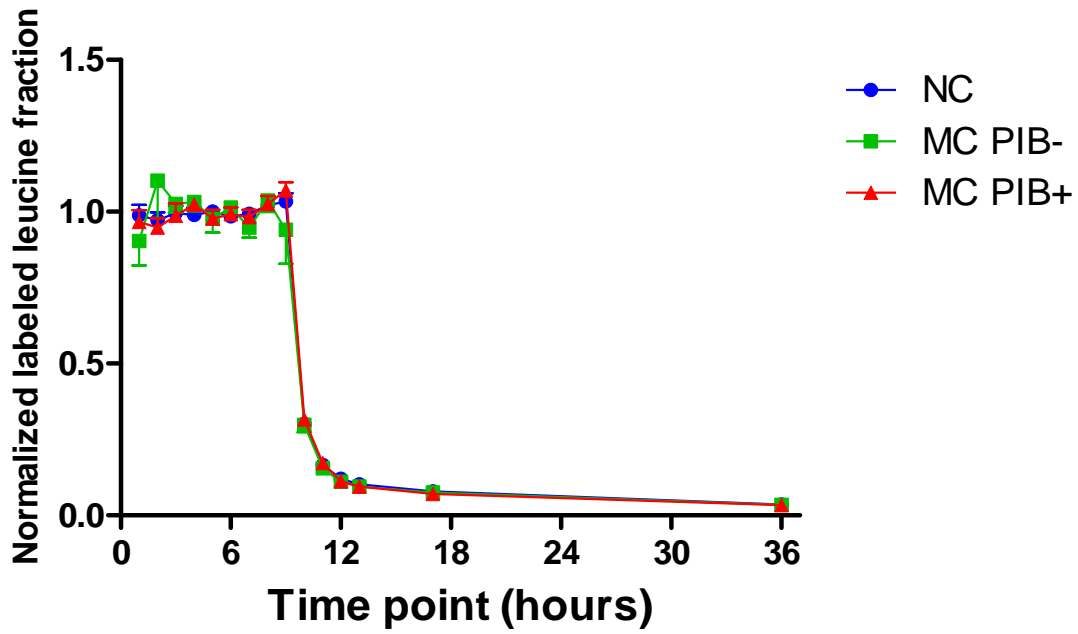

Plasma leucine enrichment was normalized to the enrichment plateau, and compared by mutation status (NC = non-mutation carriers; MC = mutation carriers) and amyloid deposition (PIB- or PIB+). Error bars represent SEM.

**Fig. S4.** Isotopic enrichment time courses of CSF A $\beta$  peptides in individual non-mutation carrier subjects

The PIB mean cortical binding potential score, the ratio of A $\beta$ 42:A $\beta$ 40 total fractional turnover rates (FTR), the ratio of CSF A $\beta$ 42:A $\beta$ 40 concentrations, and the presence or absence of the exchange process for A $\beta$ 42 revealed by the model are also tabulated for each participant. Summary values of these measures are tabulated after the last participant within the group. The isotopic enrichment time courses of A $\beta$  38 (squares, solid green line), 40 (circles, dashed red line), and 42 (triangles, dashed blue line) are presented for each participant. Lines represent model fits to each participant's data. An image with PET-PIB labeling superimposed over MRI is also shown for each participant. PIB images are displayed as Standardized Uptake Value Ratios (SUVRs) with the cerebellar gray matter used as the reference tissue.

PIB MCBP score= 0.026  
 A $\beta$ 42:A $\beta$ 40 FTR ratio: 1.06  
 CSF [A $\beta$ 42]:[A $\beta$ 40] ratio: 0.129  
 Exchange of A $\beta$ 42: Yes

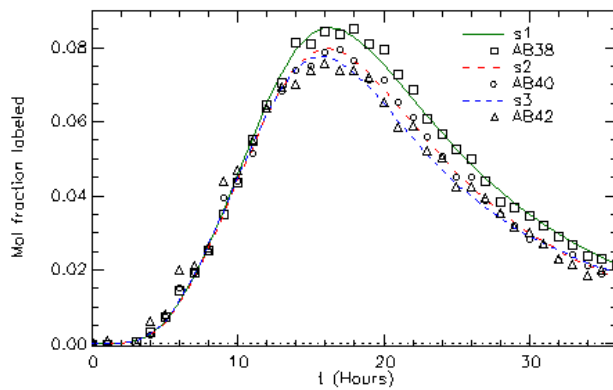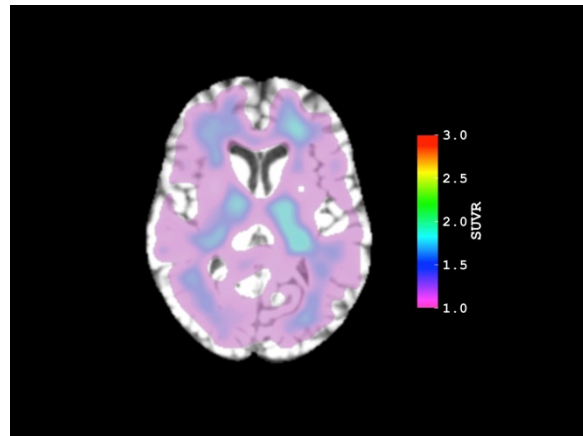

PIB MCBP score = 0.051  
 A $\beta$ 42:A $\beta$ 40 FTR ratio: 0.966  
 CSF [A $\beta$ 42]:[A $\beta$ 40] ratio: 0.153  
 Exchange of A $\beta$ 42: No

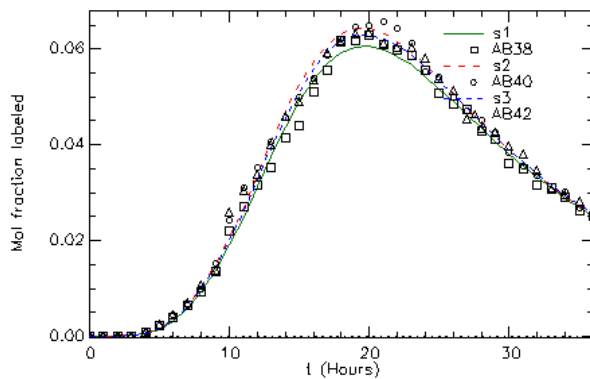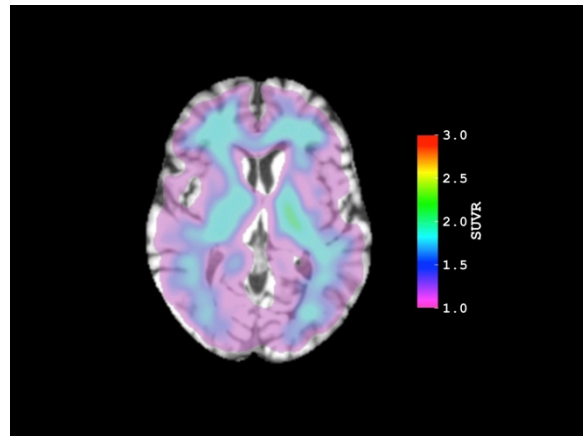

PIB MCBP score = -0.013  
A $\beta$ 42:A $\beta$ 40 FTR ratio: 0.930  
CSF [A $\beta$ 42]:[A $\beta$ 40] ratio: 0.163  
Exchange of A $\beta$ 42: No

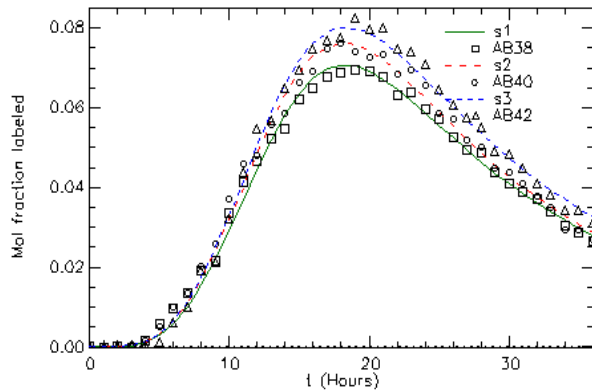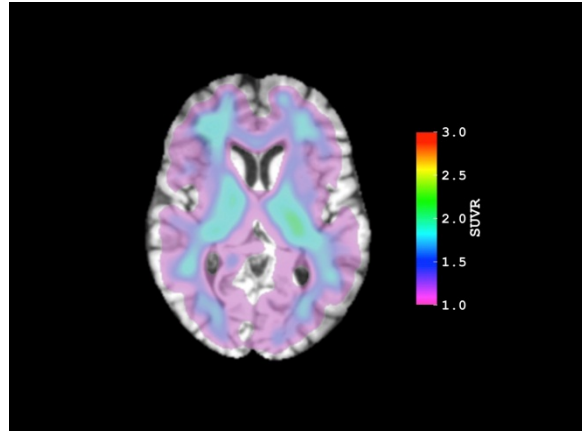

PIB MCBP score = -0.026  
A $\beta$ 42:A $\beta$ 40 FTR ratio: 0.889  
CSF [A $\beta$ 42]:[A $\beta$ 40] ratio: 0.169  
Exchange of A $\beta$ 42: No

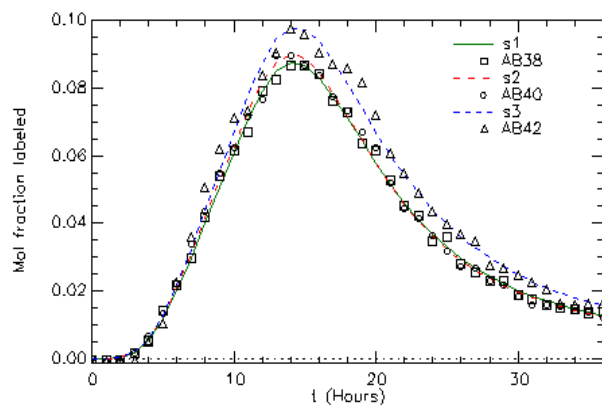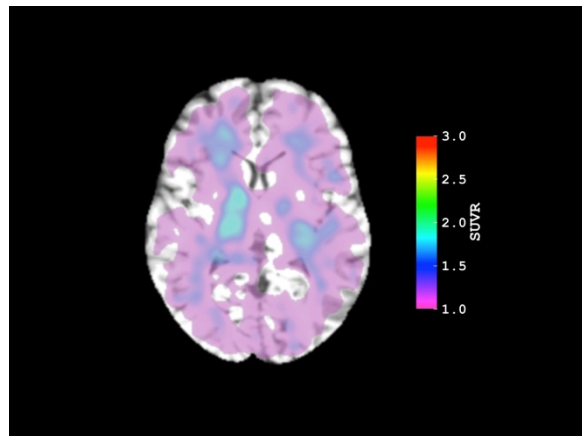

PIB MCBP score = -0.025  
A $\beta$ 42:A $\beta$ 40 FTR ratio: 0.781  
CSF [A $\beta$ 42]:[A $\beta$ 40] ratio: 0.159  
Exchange of A $\beta$ 42: Yes

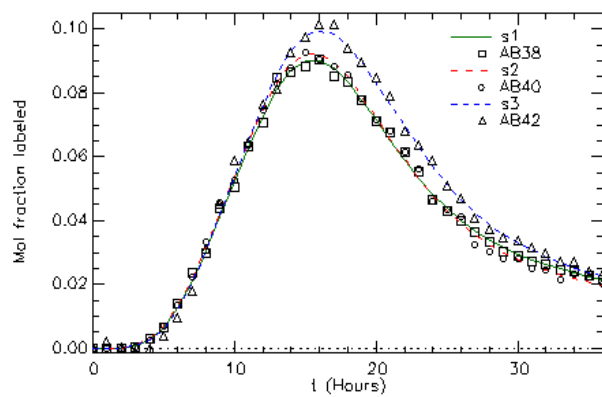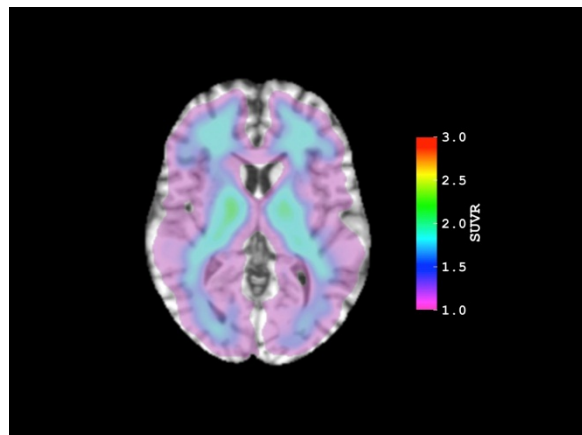

PIB MCBP score = 0.031  
A $\beta$ 42:A $\beta$ 40 FTR ratio: 0.870  
CSF [A $\beta$ 42]:[A $\beta$ 40] ratio: 0.155  
Exchange of A $\beta$ 42: No

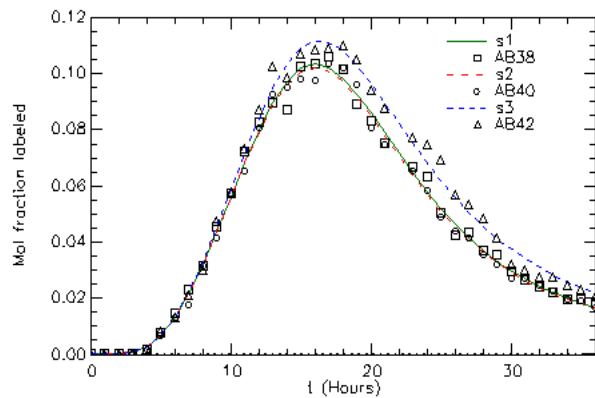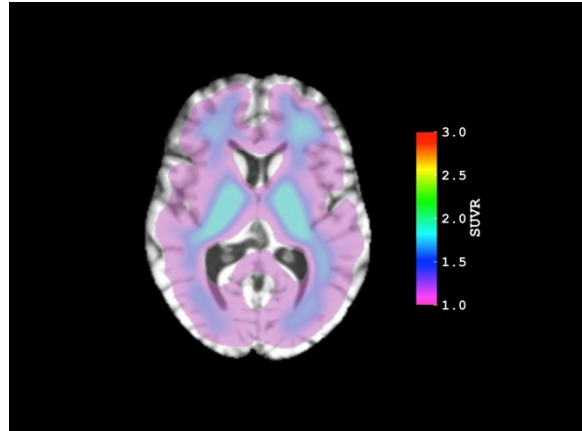

PIB MCBP score = 0.094  
A $\beta$ 42:A $\beta$ 40 FTR ratio: 0.905  
CSF [A $\beta$ 42]:[A $\beta$ 40] ratio: 0.138  
Exchange of A $\beta$ 42: No

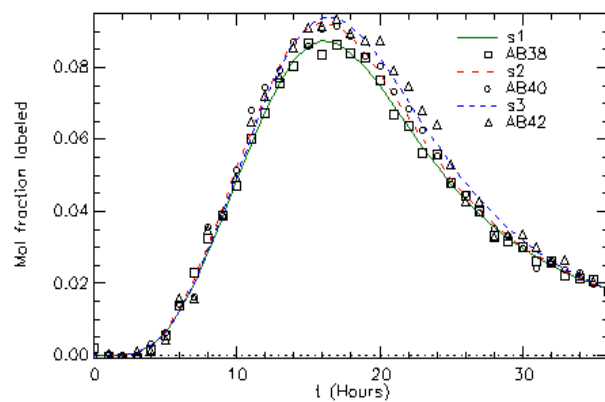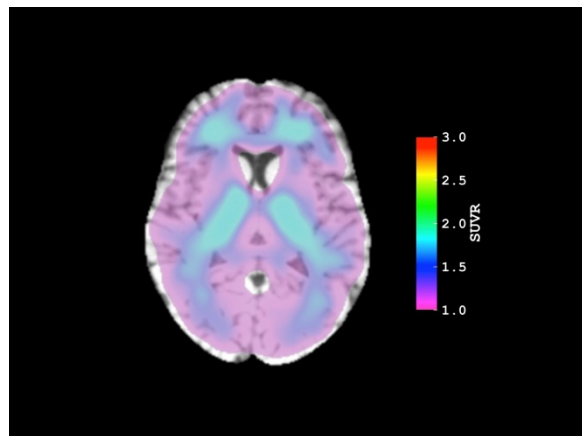

PIB MCBP score = 0.120  
A $\beta$ 42:A $\beta$ 40 FTR ratio: 0.910  
CSF [A $\beta$ 42]:[A $\beta$ 40] ratio: 0.155  
Exchange of A $\beta$ 42: No

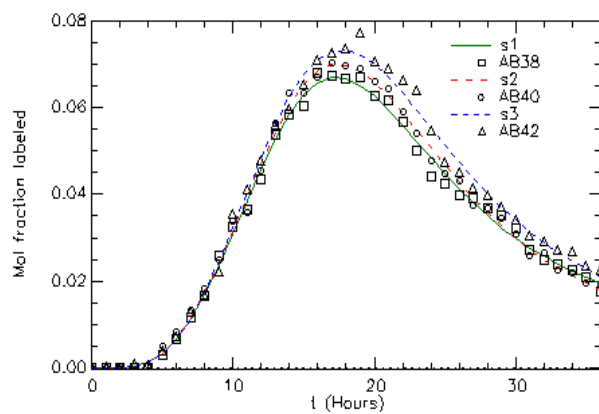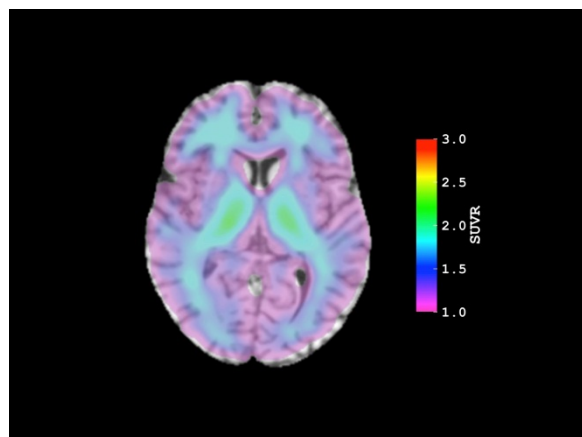

PIB MCBP score = 0.000  
 $A\beta_{42}:A\beta_{40}$  FTR ratio: 0.944  
CSF  $[A\beta_{42}]:[A\beta_{40}]$  ratio: 0.158  
Exchange of  $A\beta_{42}$ : No

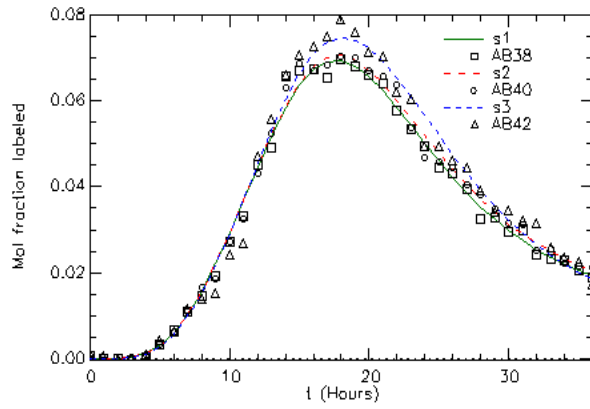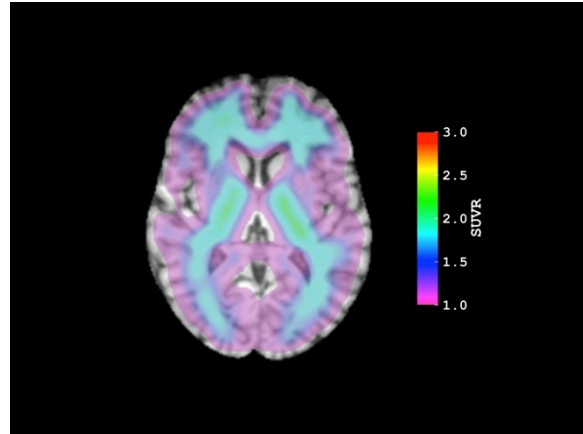

PIB MCBP score = 0.016  
 $A\beta_{42}:A\beta_{40}$  FTR ratio: 1.022  
CSF  $[A\beta_{42}]:[A\beta_{40}]$  ratio: 0.147  
Exchange of  $A\beta_{42}$ : No

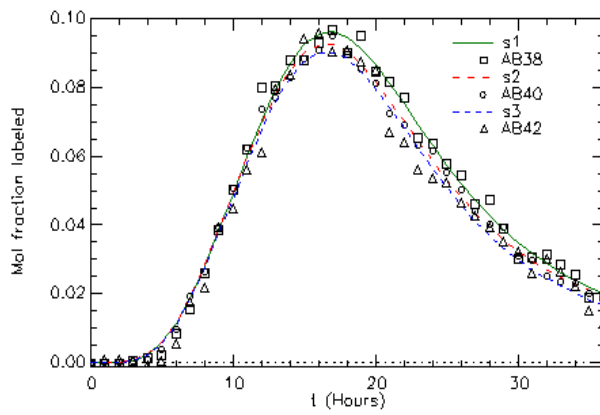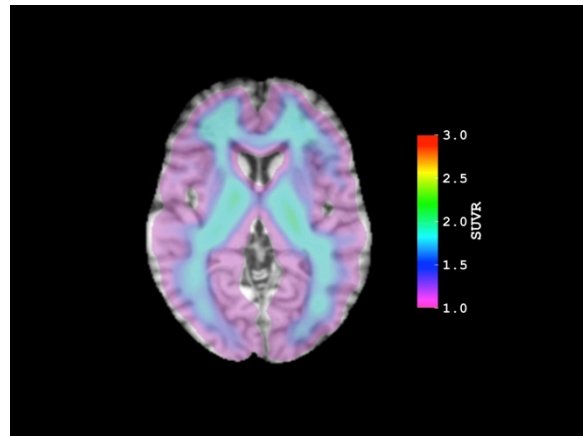

PIB MCBP score = 0.013  
 $A\beta_{42}:A\beta_{40}$  FTR ratio: 0.972  
CSF  $[A\beta_{42}]:[A\beta_{40}]$  ratio: 0.126  
Exchange of  $A\beta_{42}$ : No

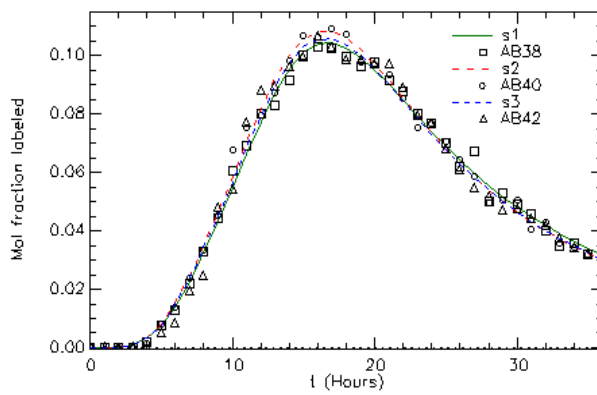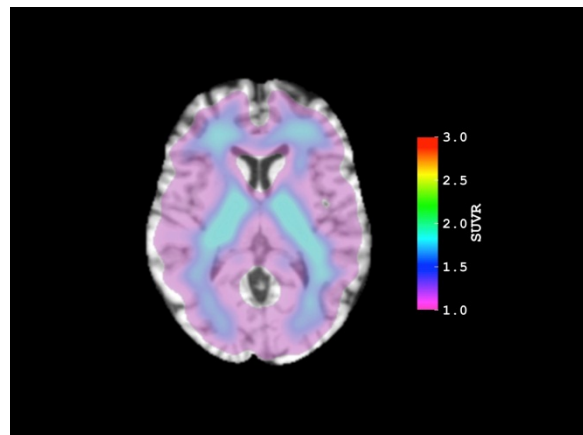

PIB MCBP score = 0.026

A $\beta$ 42:A $\beta$ 40 FTR ratio: 1.052

CSF [A $\beta$ 42]:[A $\beta$ 40] ratio: 0.139

Exchange of A $\beta$ 42: Yes

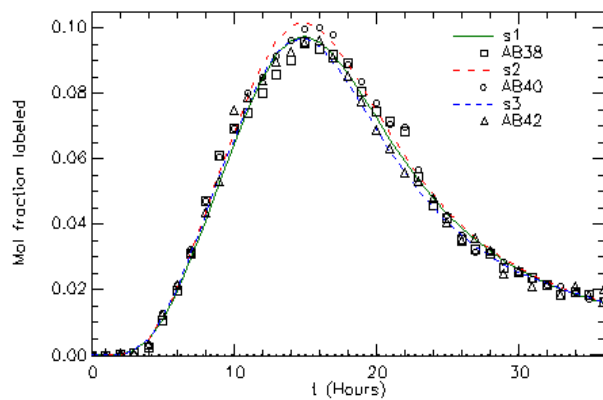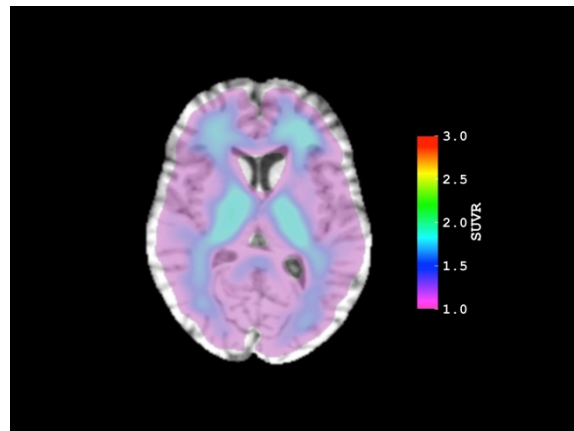

### **Summary of Non-mutation carrier group**

PIB MCBP score:  $0.026 \pm 0.045$

A $\beta$ 42:A $\beta$ 40 FTR ratio:  $0.942 \pm 0.080$

CSF [A $\beta$ 42]:[A $\beta$ 40] ratio:  $0.149 \pm 0.135$

Exchange of A $\beta$ 42: 3/12

**Fig. S5.** Isotopic enrichment time courses of CSF A $\beta$  peptides in mutation carriers with amyloid plaques (PIB+)

See **Fig. S4** for details.

PIB MCBP score = 0.725

A $\beta$ 42:A $\beta$ 40 FTR ratio: 2.04

CSF [A $\beta$ 42]:[A $\beta$ 40] ratio: 0.084

Exchange of A $\beta$ 42: Yes

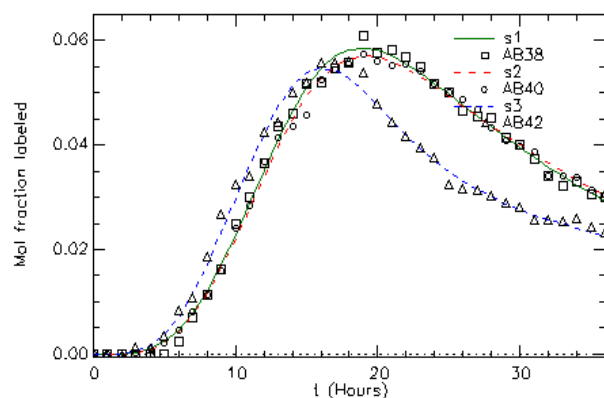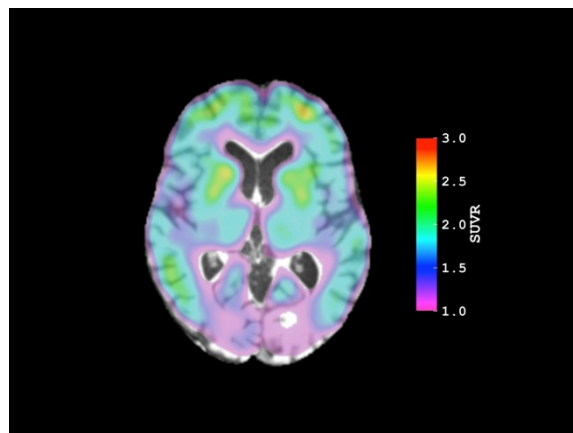

PIB MCBP score = 0.779

A $\beta$ 42:A $\beta$ 40 FTR ratio: 1.70

CSF [A $\beta$ 42]:[A $\beta$ 40] ratio: 0.087

Exchange of A $\beta$ 42: Yes

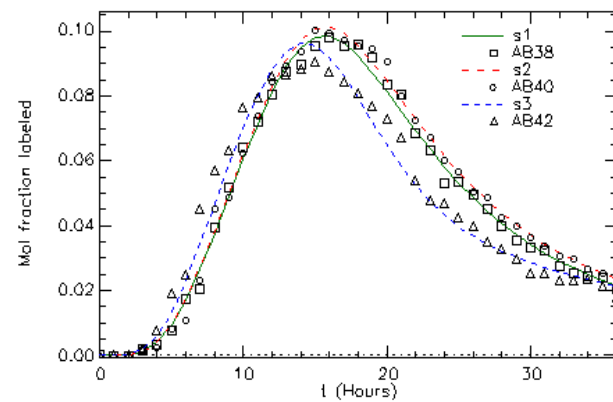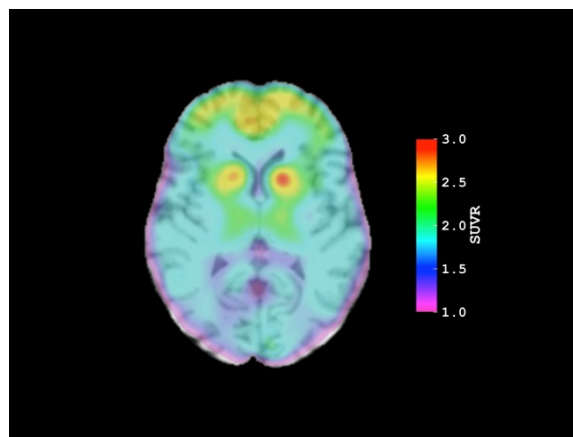

PIB MCBP score = 1.025  
 $A\beta_{42}:A\beta_{40}$  FTR ratio: 2.15  
CSF  $[A\beta_{42}]:[A\beta_{40}]$  ratio: 0.081  
Exchange of  $A\beta_{42}$ : Yes

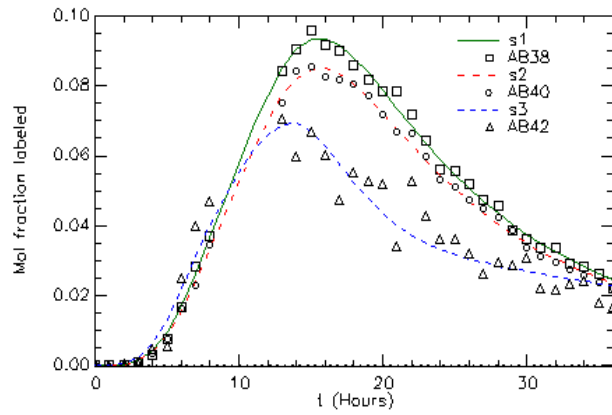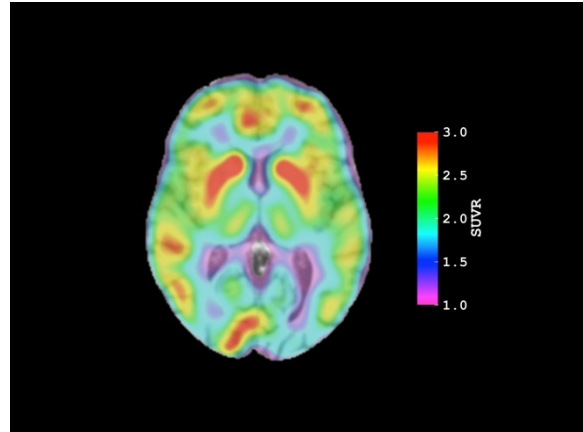

PIB MCBP score = 1.261  
 $A\beta_{42}:A\beta_{40}$  FTR ratio: 1.68  
CSF  $[A\beta_{42}]:[A\beta_{40}]$  ratio: 0.104  
Exchange of  $A\beta_{42}$ : Yes

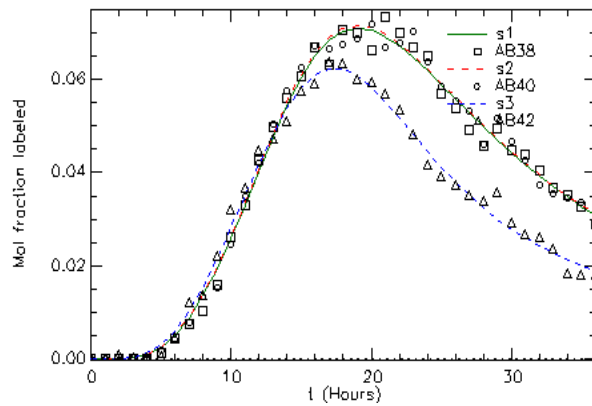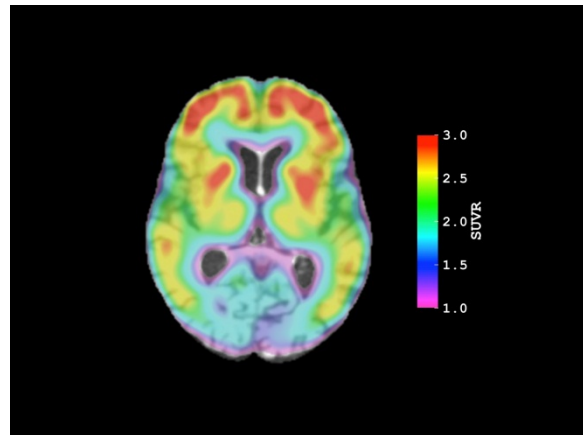

PIB MCBP score = 0.378  
 $A\beta_{42}:A\beta_{40}$  FTR ratio: 1.84  
CSF  $[A\beta_{42}]:[A\beta_{40}]$  ratio: 0.081  
Exchange of  $A\beta_{42}$ : Yes

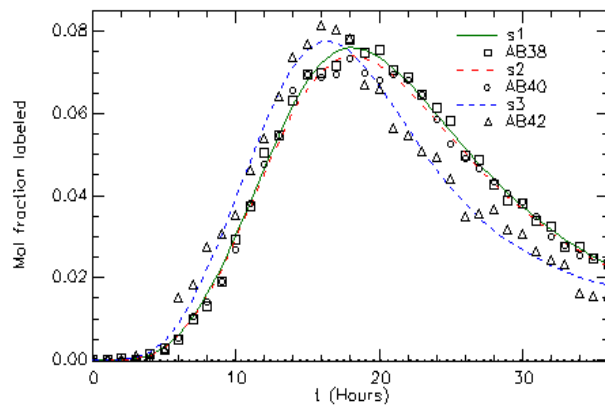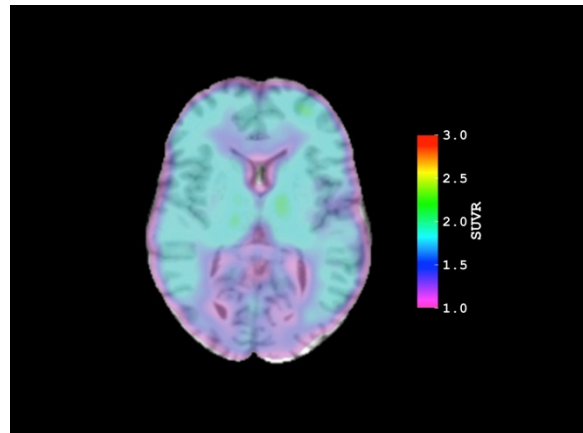



PIB MCBP score = 0.239  
A $\beta$ 42:A $\beta$ 40 FTR ratio: 1.14  
CSF [A $\beta$ 42]:[A $\beta$ 40] ratio: 0.139  
Exchange of A $\beta$ 42: No

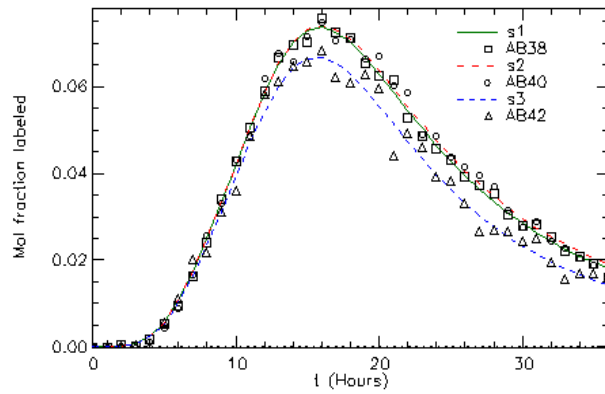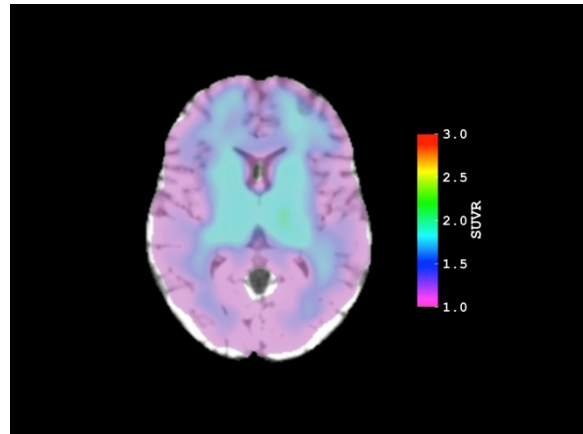

PIB MCBP score = 0.373  
A $\beta$ 42:A $\beta$ 40 FTR ratio: 1.50  
CSF [A $\beta$ 42]:[A $\beta$ 40] ratio: 0.135  
Exchange of A $\beta$ 42: Yes

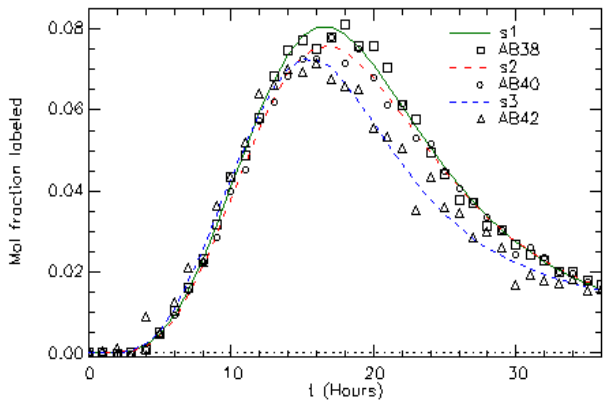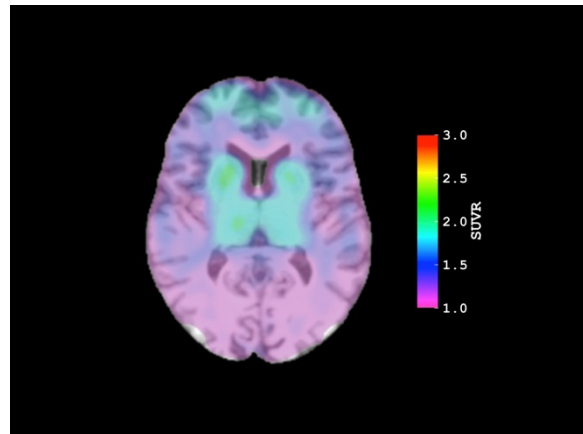

**Summary of Mutation carrier PIB+ group**

PIB MCBP score:  $0.683 \pm 0.376$   
A $\beta$ 42:A $\beta$ 40 FTR ratio:  $1.72 \pm 0.336$   
CSF [A $\beta$ 42]:[A $\beta$ 40] ratio:  $0.102 \pm 0.026$   
Exchange of A $\beta$ 42: 6/7

**Fig. S6.** Isotopic enrichment time courses of CSF A $\beta$  peptides in mutation carriers without amyloid plaques (PIB-)

See **Fig. S4** for details.

PIB MCBP score = 0.033

A $\beta$ 42:A $\beta$ 40 FTR ratio: 1.62

CSF [A $\beta$ 42]:[A $\beta$ 40] ratio: 0.100

Exchange of A $\beta$ 42: Yes

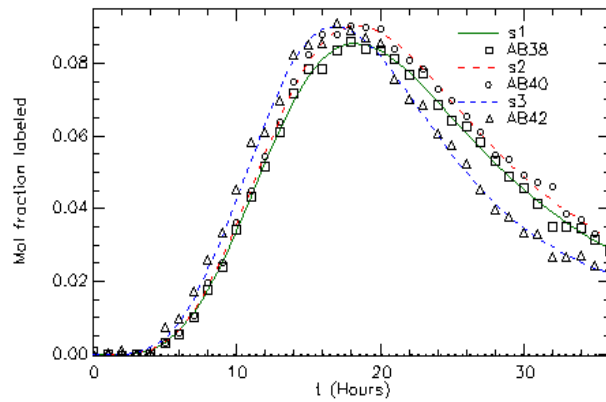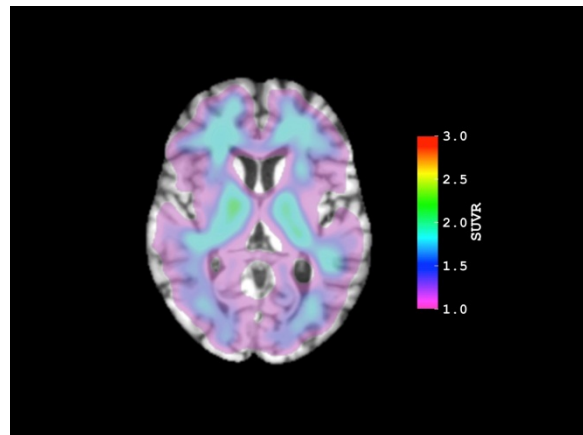

PIB MCBP score = 0.015

A $\beta$ 42:A $\beta$ 40 FTR ratio: 0.967

CSF [A $\beta$ 42]:[A $\beta$ 40] ratio: 0.215

Exchange of A $\beta$ 42: No

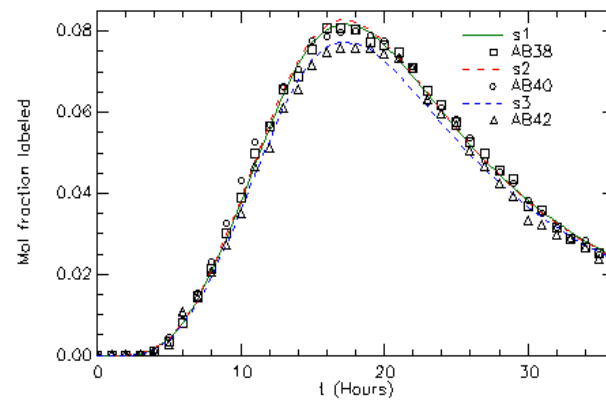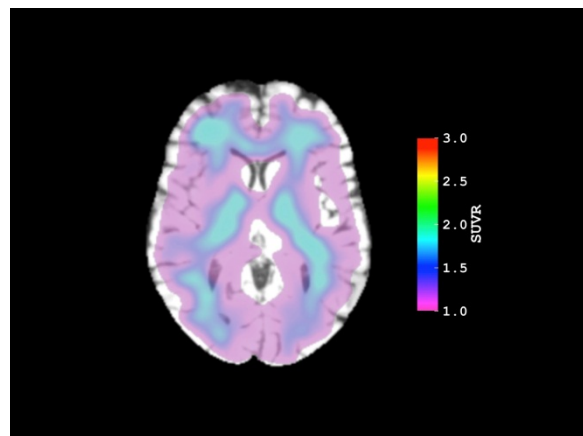

PIB MCBP score = -0.066  
A $\beta$ 42:A $\beta$ 40 FTR ratio: 1.11  
CSF [A $\beta$ 42]:[A $\beta$ 40] ratio: 0.161  
Exchange of A $\beta$ 42: Yes

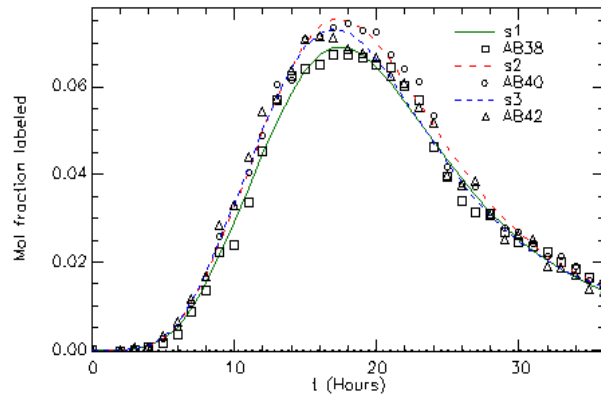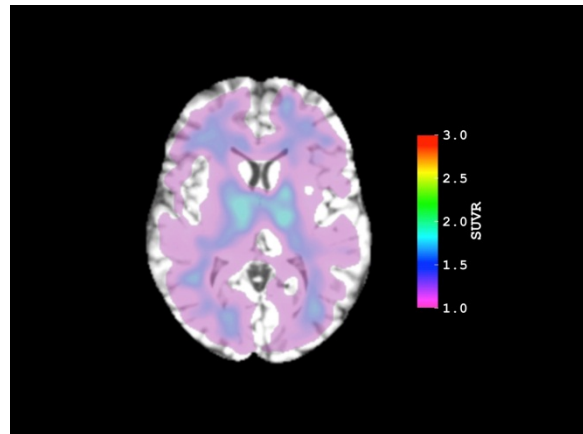

PIB MCBP score = 0.012  
A $\beta$ 42:A $\beta$ 40 FTR ratio: 1.35  
CSF [A $\beta$ 42]:[A $\beta$ 40] ratio: 0.138  
Exchange of A $\beta$ 42: Yes

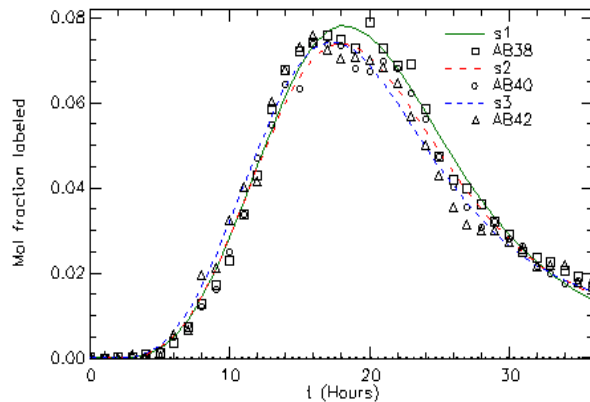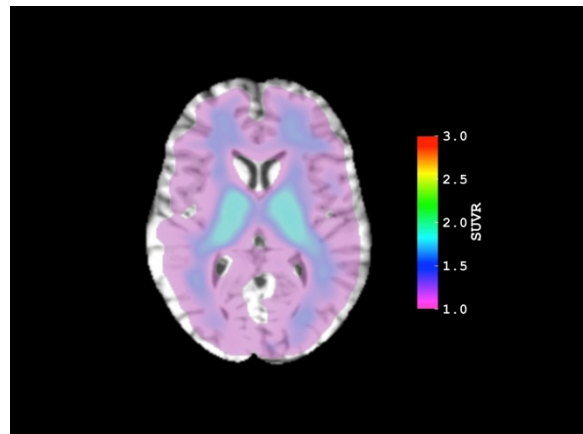

**Summary of Mutation carrier PIB- group**

PIB MCBP score:  $-0.001 \pm 0.044$   
A $\beta$ 42:A $\beta$ 40 FTR ratio:  $1.26 \pm 0.29$   
CSF [A $\beta$ 42]:[A $\beta$ 40] ratio:  $0.153 \pm 0.048$   
Exchange of A $\beta$ 42: 3/4

**Fig. S7.** Scatterplot of concentrations and selected kinetic parameters

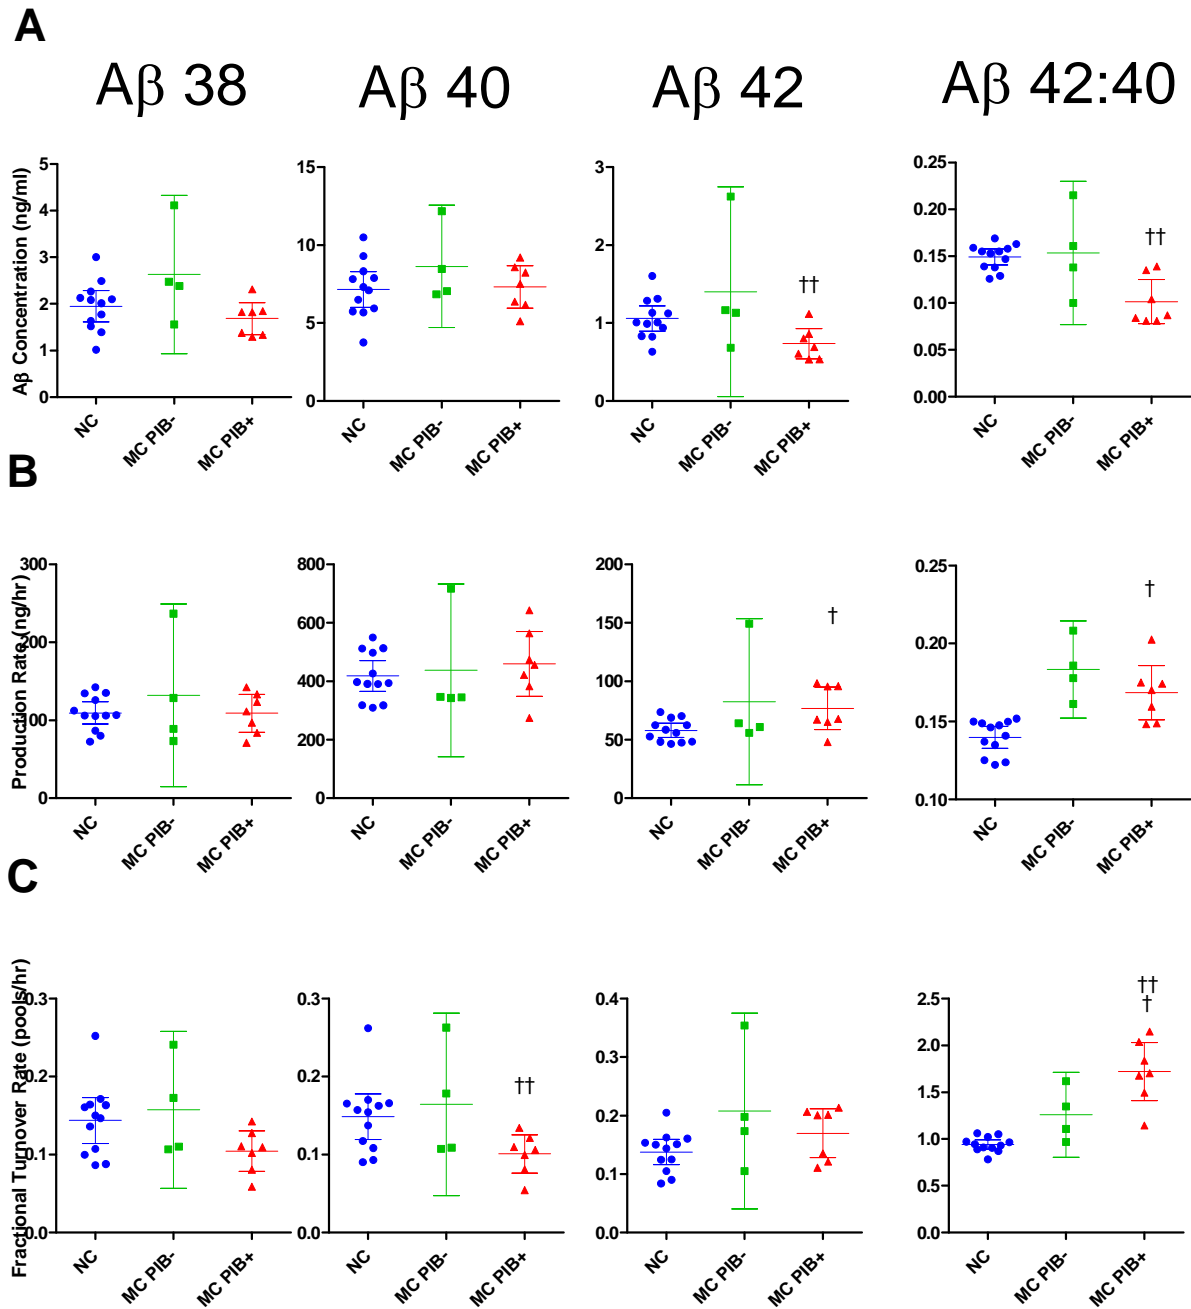

Parameters for baseline CSF A $\beta$  concentrations (A), production rate (B), and fractional turnover rate (FTR) (C) are shown for each individual non-mutation carrier (NC), and for mutation carriers (MC) without (PIB-) or with (PIB+) evidence of amyloid deposition. Each parameter was measured for A $\beta$ 38 (1<sup>st</sup> column), A $\beta$ 40 (2<sup>nd</sup> column), A $\beta$ 42 (3<sup>rd</sup> column) and the A $\beta$ 42:40 ratio (4<sup>th</sup> column), and compared by mutation status and amyloid deposition. Error bars indicate 95% CI. Statistical significance based on mutation status (†) and PIB MCBP score (††) are indicated.

Video file: A $\beta$ 42 and A $\beta$ 40 Stable Isotope Labeling Kinetic model in the CNS of PS1 and PS2 mutation carriers.

The model compartments for soluble, exchange, and irreversible loss of A $\beta$  are displayed on a template MRI image with a hypothesized soluble compartment throughout the CNS, and exchange and irreversible loss around fibrillar plaques (in purple). Location of fibrillar plaques was determined using the average PiB image for PiB+ mutation carriers. Note: labeled A $\beta$  pools have exaggerated spatial scale for visual comparison.

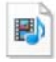

FACS Video 1.mpg
